# Supplementary material for: A high performance wearable strain sensor with advanced thermal management for motion monitoring
Source: PubMed Central journal article supplement (PMC7363829; doi:10.1038/s41467-020-17301-6), 2020-07-15
Supplement: 41467_2020_17301_MOESM1_ESM.pdf [file 41467_2020_17301_MOESM1_ESM.pdf]

Supplementary Information

**A High Performance Wearable Strain Sensor with Advanced Thermal Management for Motion Monitoring**

Tan, et al.

## Supplementary Figures

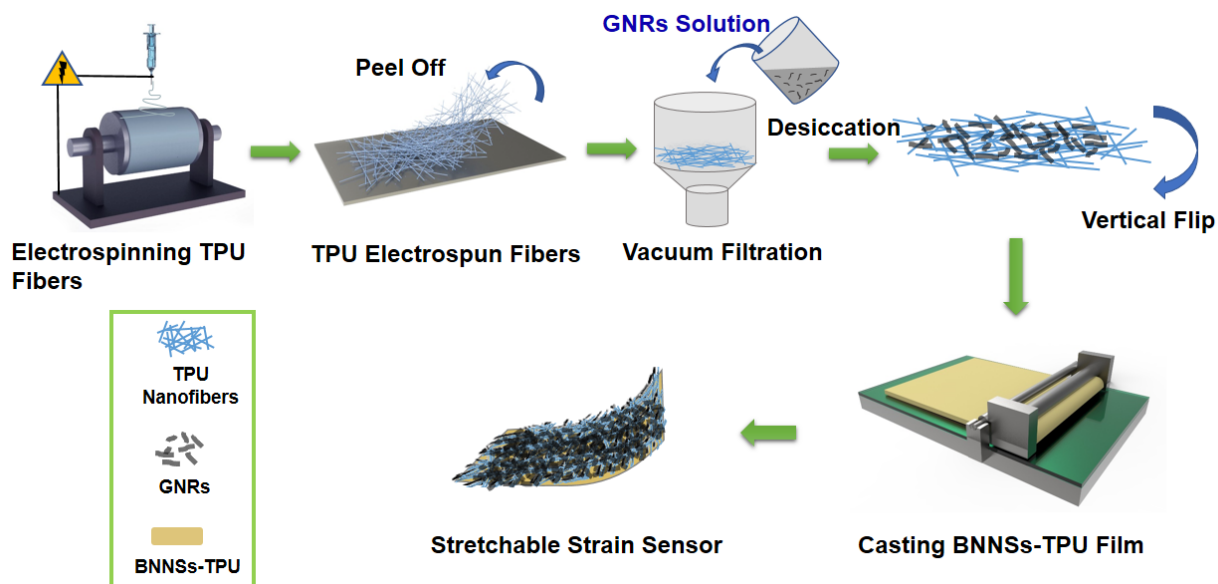

**Supplementary Figure 1. Scheme of the preparation process of the stretchable strain sensor.** The process mainly includes electrospinning, vacuum filtration, casting, and stick.

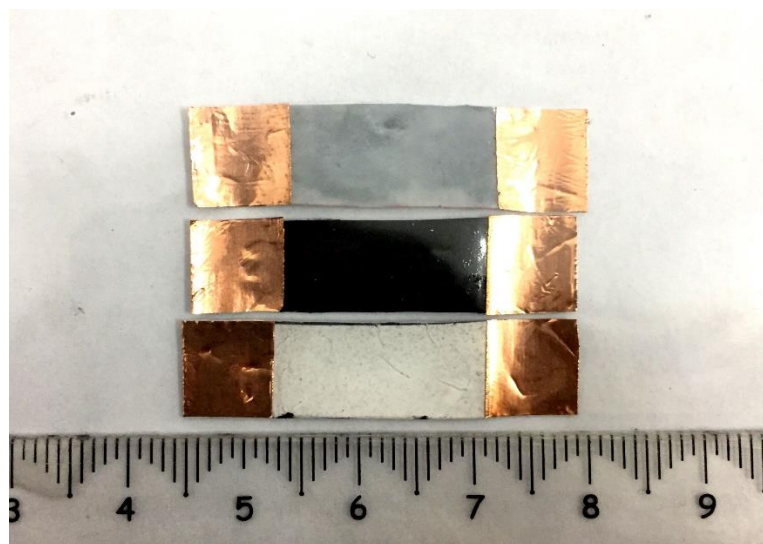

**Supplementary Figure 2. Photograph of the stretchable sensor.** Bottom: the side of electrospun TPU fibers, middle: the side of pure TPU film, top: the side of TPU-BNNSs film.

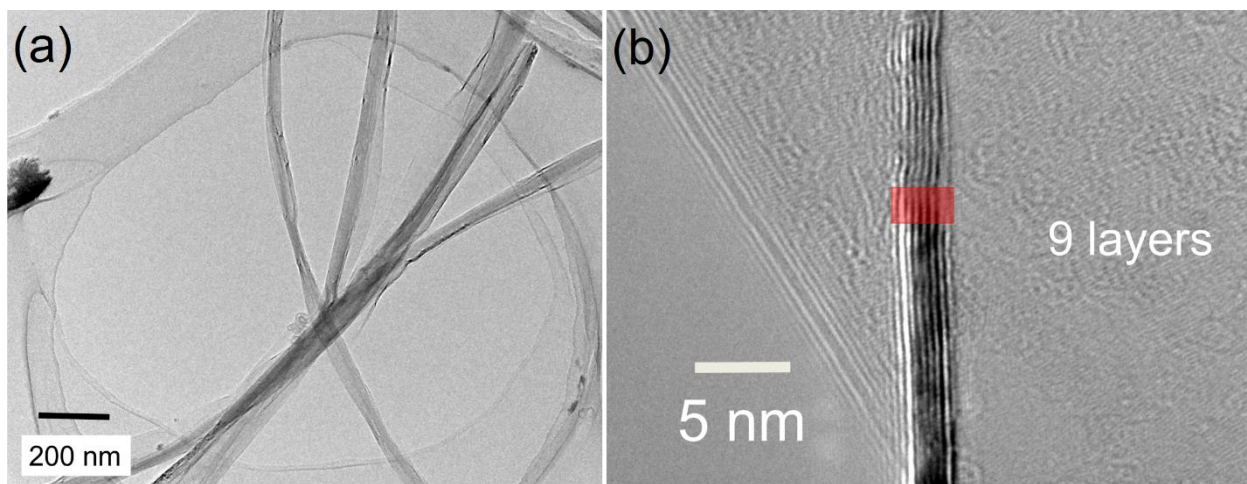

**Supplementary Figure 3. TEM images of GNRs.** The GNRs have a quasi one-dimensional (1D) structure. **b** the thickness of individual GNR.

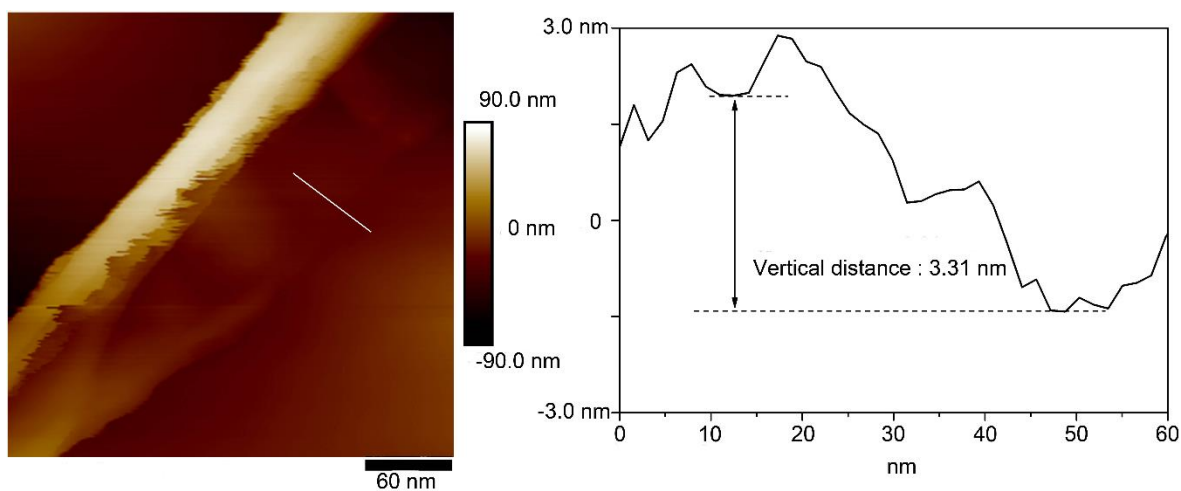

**Supplementary Figure 4. AFM results of GNR and its corresponding vertical distance.** The GNR has a thickness about 3 nm.

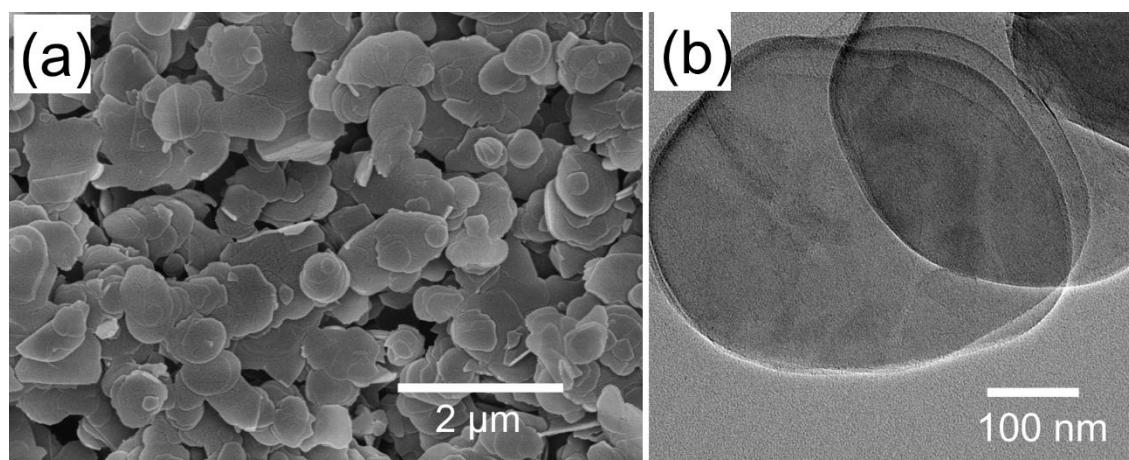

**Supplementary Figure 5. SEM and TEM images of the as-exfoliated BNNSs.** BNNS has a flat morphology with an average lateral size of 1-2  $\mu\text{m}$ . **a** SEM image, and **b** TEM image.

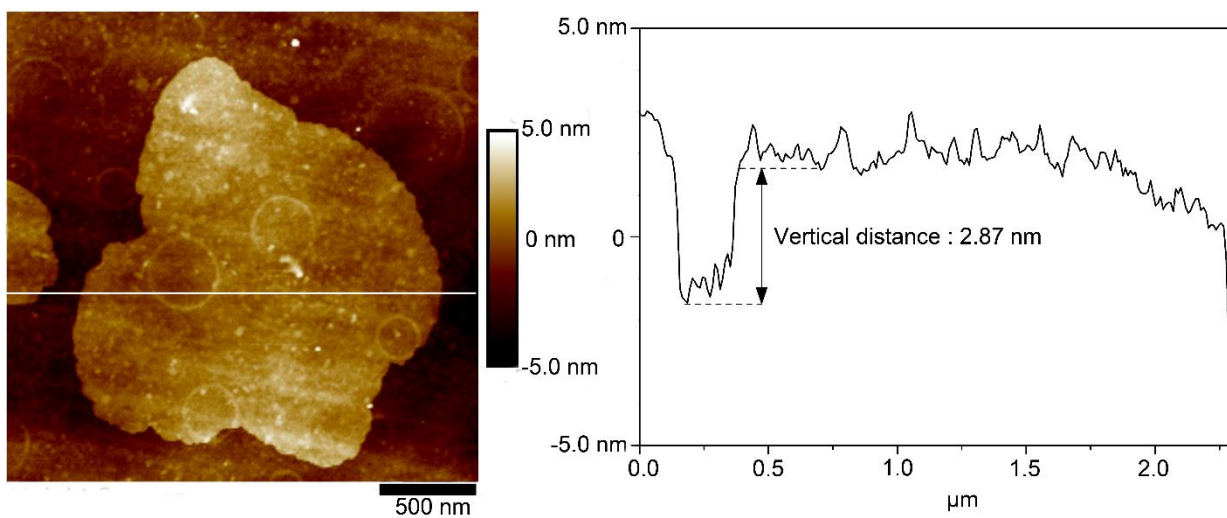

**Supplementary Figure 6. AFM results of BNNS and its corresponding vertical distance. BNNS has a thickness of about 3 nm**

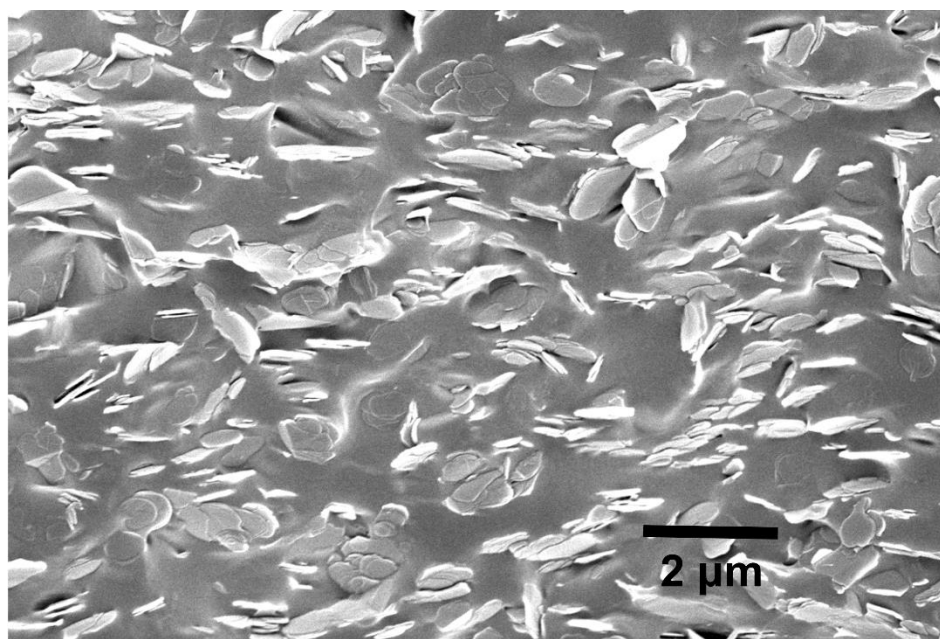

**Supplementary Figure 7. SEM image of fractured surfaces of TPU-BNNSs layer. The BNNSs are homogeneously dispersed, and well overlapped in the TPU matrix.**

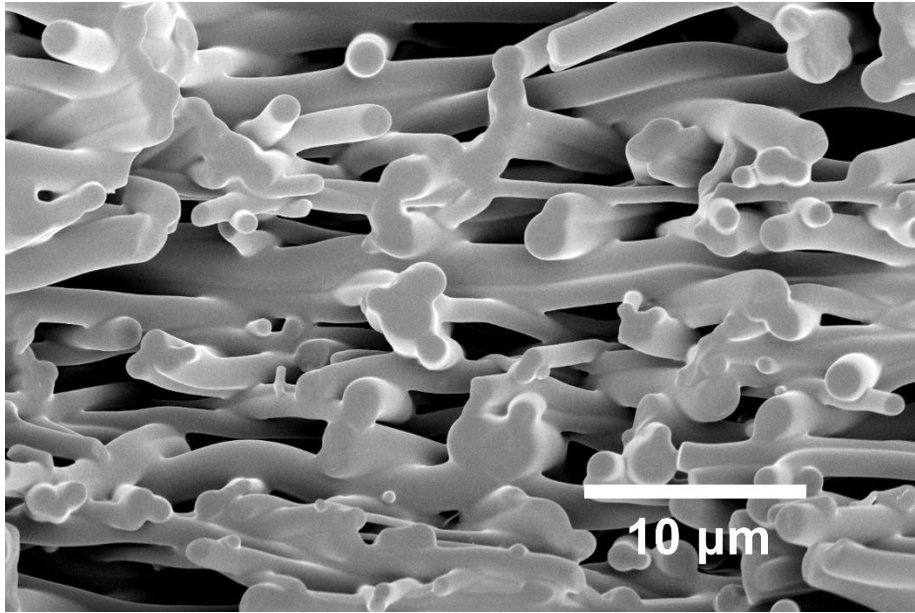

**Supplementary Figure 8. Cross-sectional view of the porous fibrous mats.** The electrospun TPU fibrous membrane with porous structure has a suppressed thermal conductivity, which can help prevent the skin from burning damage when the device is attached on human skin as a wearable device.

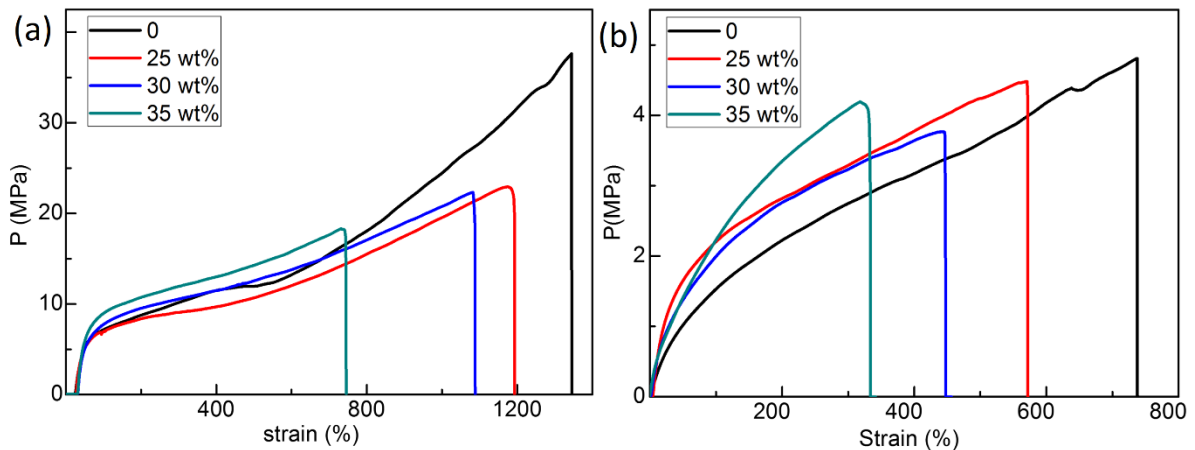

**Supplementary Figure 9. Strain-stress curves of the samples. a** TPU-BNNSs film and **b** strain sensor with BNNSs concentration from 0 to 35 wt %, respectively.

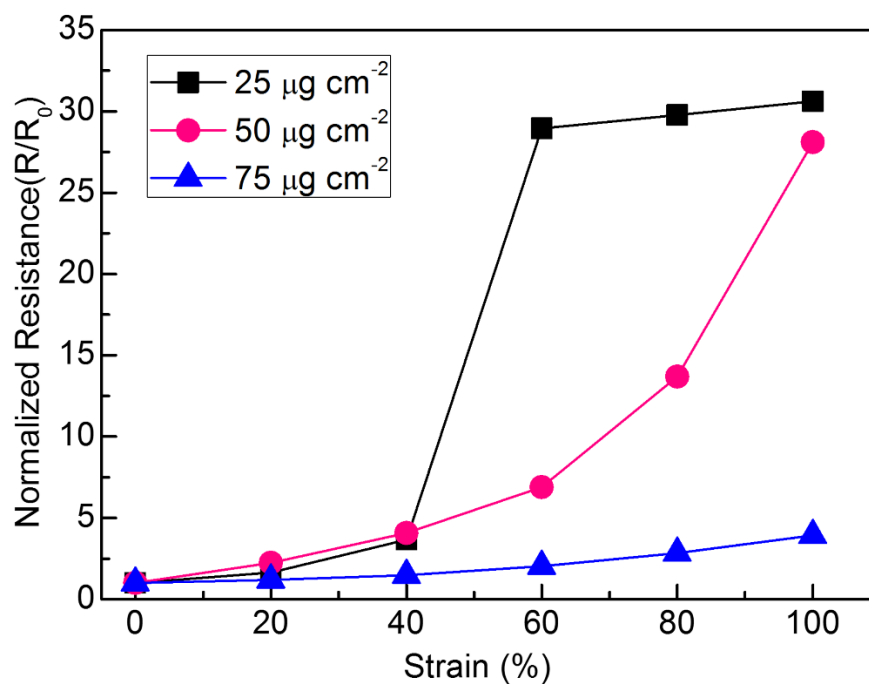

**Supplementary Figure 10. Normalized resistance of the samples.** The sample contains  $25 \mu\text{g cm}^{-2}$ ,  $50 \mu\text{g cm}^{-2}$ , and  $75 \mu\text{g cm}^{-2}$  GNRs under a continuous strain from 0 to 100%, respectively.

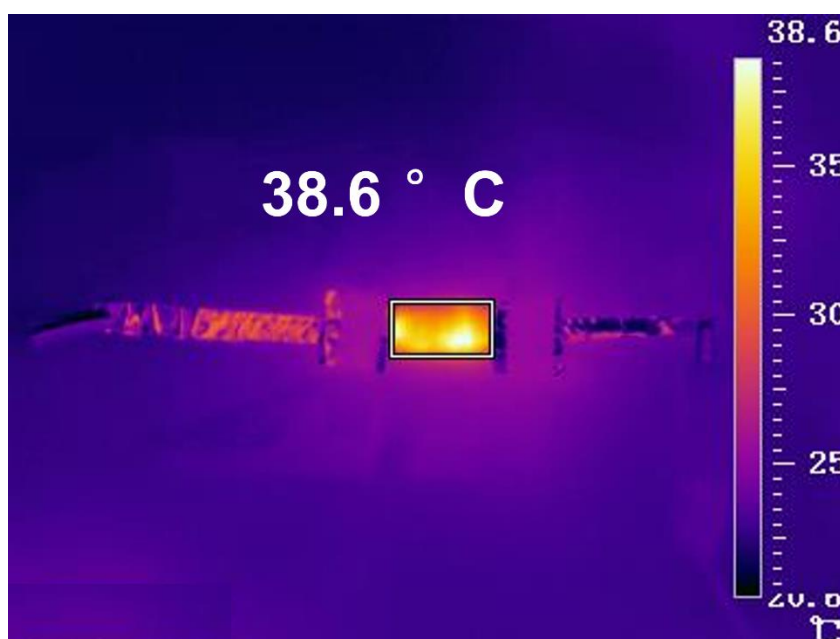

**Supplementary Figure 11. Surface temperature of GNRs without encapsulation.** The temperature is higher than that with encapsulation.

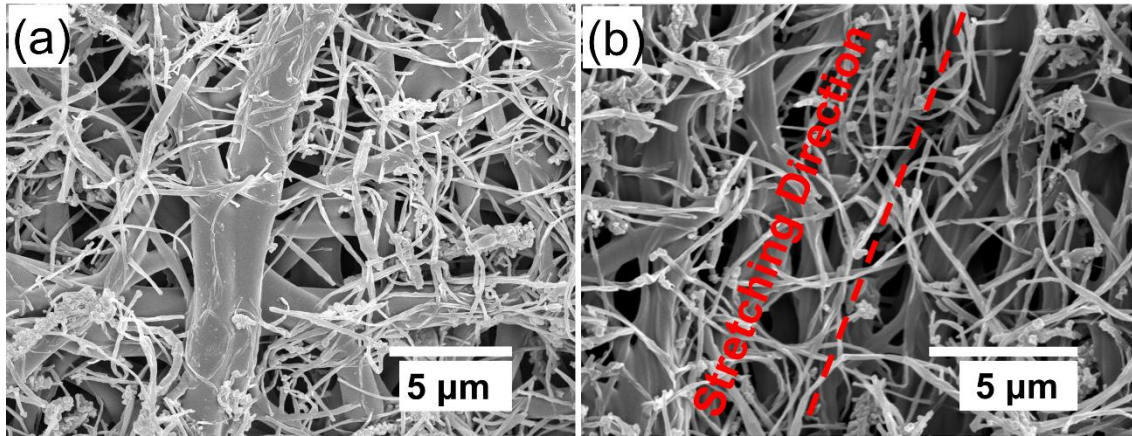

**Supplementary Figure 12.** SEM images of GNRs on electrospinning TPU fibrous membrane. **a** before and **b** after stretching.

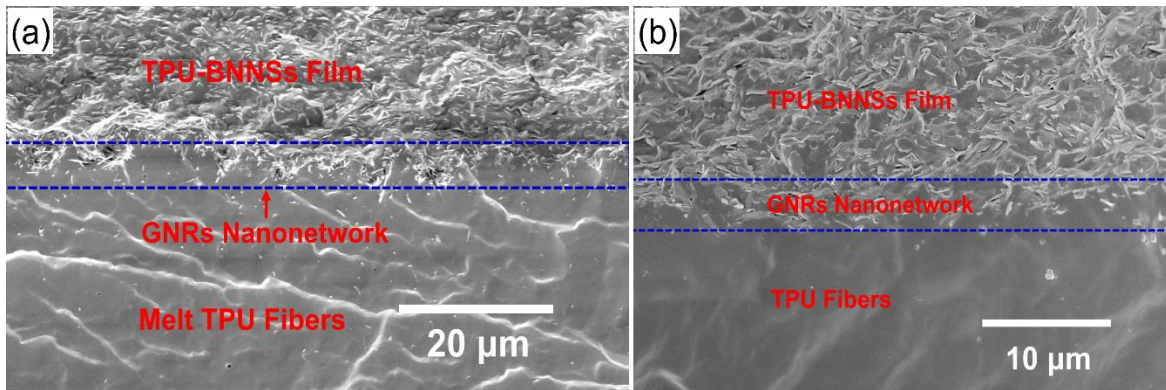

**Supplementary Figure 13.** Cross-section SEM image of the strain sensor after 5000 cycles. One can see that no obvious structure separation of the strain sensor has been observed.

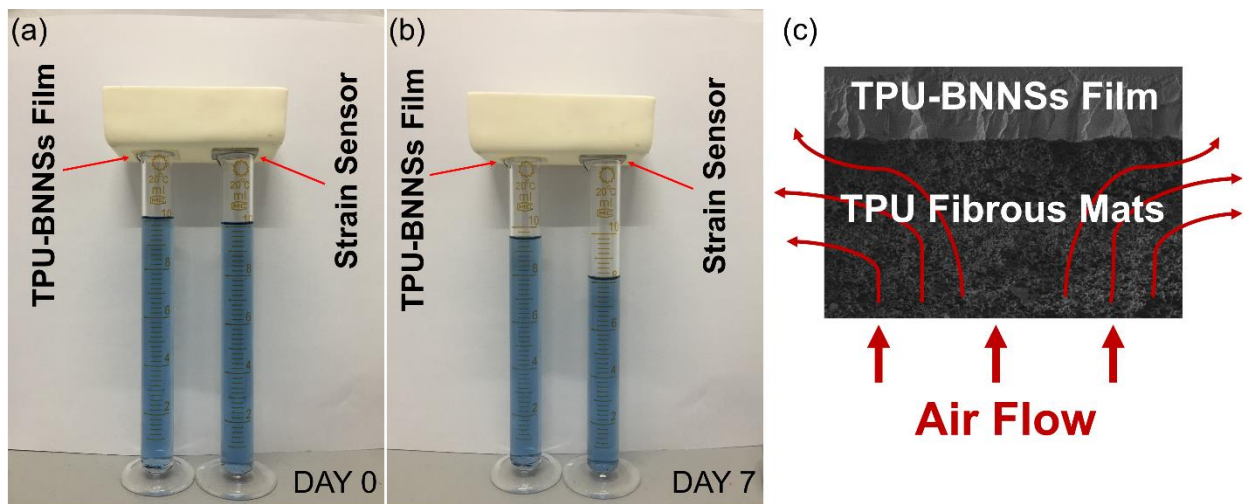

**Supplementary Figure 14.** Gas permeability test to evaluate breathability of the strain sensor. **a** Day 0 and **b** day 7. **c** Schematic diagram of the process of gas permeation in the strain sensor.

## Supplementary Tables

### Supplementary Table 1. Details for calculating thermal conductivity of TPU-BNNSs film.

Density, Specific heat, thermal diffusivity, and therefore thermal conductivity of the as-casted TPU-BNNSs film with different contents of BNNSs

| <b>BNNSs Contents</b> | <b>Density (g cm<sup>-1</sup>)</b> | <b>Specific Heat (J g<sup>-1</sup> K<sup>-1</sup>)</b> | <b>Thermal Diffusivity (mm<sup>2</sup> s<sup>-1</sup>)</b> | <b>Thermal Conductivity (W m<sup>-1</sup> K<sup>-1</sup>)</b> |
|-----------------------|------------------------------------|--------------------------------------------------------|------------------------------------------------------------|---------------------------------------------------------------|
| <b>0</b>              | 1.2180                             | 1.7283                                                 | 0.1931                                                     | 0.4064                                                        |
| <b>25 wt%</b>         | 1.3559                             | 1.7126                                                 | 0.4658                                                     | 1.0816                                                        |
| <b>30 wt%</b>         | 1.3966                             | 1.7107                                                 | 0.4935                                                     | 1.1791                                                        |
| <b>35 wt%</b>         | 1.4172                             | 1.6892                                                 | 0.57234                                                    | 1.3701                                                        |

### Supplementary Table 2. Details for calculating thermal conductivity of the strain sensor.

Density, Specific heat, thermal diffusivity, and therefore thermal conductivity of the strain sensor with different contents of BNNSs.

| <b>BNNSs Contents</b> | <b>Density (g cm<sup>-1</sup>)</b> | <b>Specific Heat (J g<sup>-1</sup> K<sup>-1</sup>)</b> | <b>Thermal Diffusivity (mm<sup>2</sup> s<sup>-1</sup>)</b> | <b>Thermal Conductivity (W m<sup>-1</sup> K<sup>-1</sup>)</b> |
|-----------------------|------------------------------------|--------------------------------------------------------|------------------------------------------------------------|---------------------------------------------------------------|
| <b>0</b>              | 1.1726                             | 1.7095                                                 | 0.1912                                                     | 0.3833                                                        |
| <b>25 wt%</b>         | 1.2519                             | 1.6901                                                 | 0.3338                                                     | 0.7063                                                        |
| <b>30 wt%</b>         | 1.2963                             | 1.6853                                                 | 0.3649                                                     | 0.7972                                                        |
| <b>35 wt%</b>         | 1.3230                             | 1.6832                                                 | 0.4169                                                     | 0.9284                                                        |
