# Supplementary material for: A high performance wearable strain sensor with advanced thermal management for motion monitoring
Source: PubMed Central journal article supplement (PMC7363829; doi:10.1038/s41467-020-17301-6), 2020-07-15
Supplement: 41467_2020_17301_MOESM2_ESM.pdf [file 41467_2020_17301_MOESM2_ESM.pdf]

## Description of Additional Supplementary Files

File Name: Supplementary Movie 1

Description: Saturated temperatures of the sample with 0 BNNSs.

File Name: Supplementary Movie 2

Description: Saturated temperatures of the sample with 25 wt% BNNSs.

File Name: Supplementary Movie 3

Description: Saturated temperatures of the sample with 30 wt% BNNSs.

File Name: Supplementary Movie 4

Description: Saturated temperatures of the sample with 35 wt% BNNSs.

File Name: Supplementary Movie 5

Description: Dynamic operational temperature fluctuation of stretchable strain sensor under repeating stretching-releasing processes
